P1927

## A European randomised controlled trial for m-health guided cardiac rehabilitation in the elderly; results of the EU-CaRE RCT study

E.P. De Kluiver<sup>1</sup>, A.E. Van Der Velde<sup>1</sup>, E.P. Meindersma<sup>2</sup>, L.F. Prins<sup>3</sup>, M. Wilhelm<sup>4</sup>, M.C. Iliou<sup>5</sup>, C. Pena Gil<sup>6</sup>, J.R. Gonzalez-Juanatey<sup>6</sup>, J.A. Snoek<sup>1</sup>, E. Kolkman<sup>3</sup>, A.W.J. Van't Hof<sup>7</sup>, E. Prescott<sup>8</sup>

<sup>1</sup>Isala Hospital, Zwolle, Netherlands (The); <sup>2</sup>Radboud University Medical Centre, Nijmegen, Netherlands (The); <sup>3</sup>Diagram BV, Zwolle, Netherlands (The); <sup>4</sup>Preventive Cardiology & Sports Medicine, Inselspital Bern, Bern, Switzerland; <sup>5</sup>Assistance Hopiteaux Publique de Paris, Paris, France; <sup>6</sup>University Hospital of Santiago de Compostela, Santiago de Compostela, Spain; <sup>7</sup>Maastricht University Medical Centre (MUMC), Maastricht, Netherlands (The); <sup>8</sup>Bispebjerg University Hospital, Copenhagen, Denmark

On behalf of EU-CaRE study group

**Funding Acknowledgement:** European Union's Horizon 2020 research and innovation programme under grant agreement number 634439, and funding from the Swiss Government.

**Introduction:** Knowledge about effectiveness of cardiac rehabilitation (CR) in the elderly is limited. Participation rates in supervised CR are consistently lower in the elderly and innovative interventions are needed. The EU has granted a CR study project; a randomised controlled trial conducted in 5 European countries, investigating the effectiveness of mobile telemonitoring guided CR (mCR) in elderly cardiac patients who declined regular CR.

**Methods:** Patients  $\geq 65$  years with indication for CR who declined regular CR were eligible for inclusion. Patients were randomised between regular care (without CR) and a 6-month mCR programme: dedicated programmed smartphone, heartrate monitoring (target HR zones) and coaching. The primary endpoint is the difference in VO<sub>2</sub>peak between 6-months follow-up and baseline.

**Results:** Between 2015 and 2018 179 patients were included. Baseline characteristics between groups (table 1) did not differ significantly, except for hypertension. The difference in VO<sub>2</sub>peak was significantly better in the mCR group (table 1). After correction (mixed linear model) for baseline VO<sub>2</sub> peak (fixed factor) and centre (random factor) this difference remained significant. Mean number of registered activity sessions was 4.79 (95% CI; 4.07–5.50) per patient per week.

**Conclusions:** The application of mCR in elderly patients who declined regular CR results in a better physical condition after 6 months. Compliance to mCR was excellent.

Table 1. Baseline and primary outcome parameters

| Baseline                                                     | Control Programme (n=90) | mCR Programme (n=89) | P-value |
|--------------------------------------------------------------|--------------------------|----------------------|---------|
| Gender (m/f)                                                 | 76/14                    | 69/20                | 0.238   |
| Age (mean $\pm$ SD)                                          | 73.57 $\pm$ 5.46         | 72.38 $\pm$ 5.37     | 0.121   |
| Diabetes                                                     | 15 (16.7%)               | 23 (25.8%)           | 0.133   |
| Hypertension                                                 | 60 (66.7%)               | 73 (82.0%)           | 0.019*  |
| Hypercholesteremia                                           | 71 (78.3%)               | 74 (83.1%)           | 0.468   |
| Normal LV-function                                           | 48/89 (53.9%)            | 53/89 (59.6%)        | 0.497   |
| Index event (CABG/Valve/PCI/none)                            |                          |                      | 0.735   |
| Cardiac history prior to index event                         | 48/89 (53.9%)            | 53/89 (59.6%)        | 0.702   |
| Non cardiac comorbidity                                      | 40 (44.4%)               | 44 (49.4%)           | 0.503   |
| Results                                                      |                          |                      |         |
| Baseline VO <sub>2</sub> peak (ml/kg/min) (95% CI)           | 19.83 (18.65–21.01)      | 18.78 (18.67–19.89)  | 0.191   |
| Delta VO <sub>2</sub> peak at 6 months (ml/kg/min) (95% CI)  | 0.20 4 (-0.34–0.83)      | 1.62 (0.86–2.39)     | 0.005*  |
| Corrected delta VO <sub>2</sub> peak at 6 months (ml/kg/min) | 0.50 (-1.04–2.04)        | 1.65 (0.11–3.2)      | 0.015*  |

\*Significant.
